# Supplementary material
Source: publisher figshare collection journal article supplement (https://sage.figshare.com/ndownloader/files/21481698)

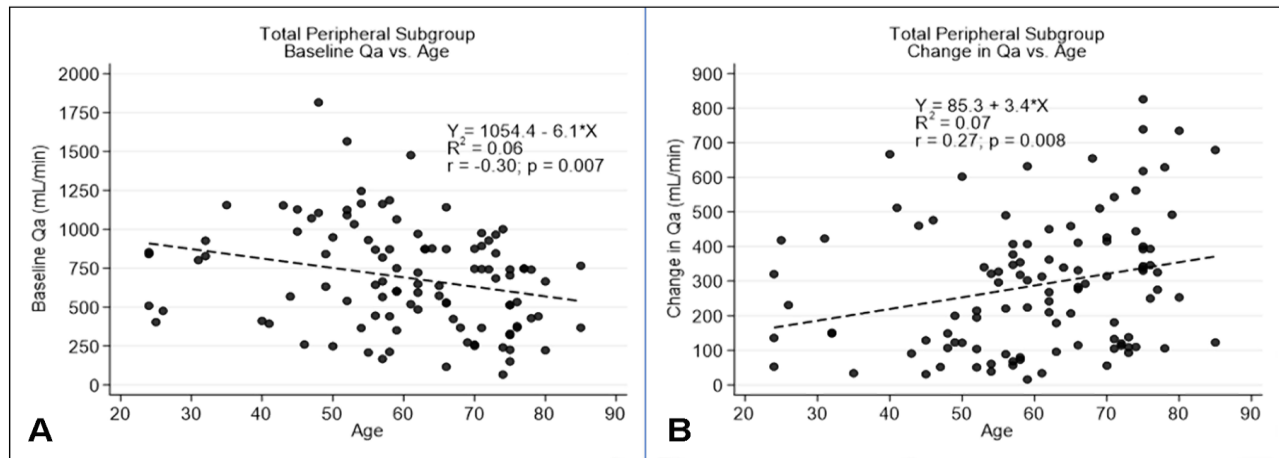

Supplemental Figure 1 - Correlation of Qa and Age. A – Baseline Qa, B – Change in Qa (Qa, AVF blood flow)

Supplement: Supplementary file 1 [file 21481698]
